# Supplementary material for: Structural insight into inhibition of human Class II PI3K isoforms: homology modeling, binding site characterization, docking and molecular dynamics studies
Source: Royal Society of Chemistry journal article supplement (doi:10.1039/c6ra15417d), 2016-01-01
Supplement: c6ra15417d1.pdf [file c6ra15417d1.pdf]

## Supplementary information

PI3Kbeta .VGHMKVLSKQVEALNKILKTIN.SLIIKINAVKLNRA.KGKEAMHTCLKQSAVREALSDLO  
PI3Kdelta .THHMKVLMKQGEALSKLKALN.DFVKLSSQKTPKP.QTKELMHLCMRQEAYLEALSHLQ  
PI3Kalpha .GMYLKHLNRQVEAMEKILINLT.DILKQEKKDETQK.VQMKFLVEQMRRPDMDALQGFL  
PI3Kgamma GTAMLHDFTOQVQVIEMLQKVTLDIKSLSAEKYDVSSQVISQLKQKLENLQNSQLPESFR  
PI3KC2alpha GKRLREELLKQTKLVQLLGGVAEKVROASGSA....RQVVLQRSMERVQSFFQKN.KCR  
PI3KC2beta GKGLREEFNRCWLNVNALAKLAQVREAPSA....RQGLRTGLEEVKQFFALNGSCR  
PI3KC2gamma GKALNDEFKKEQLIKILGDIIGERVKSASDHQ....RQEVLKKEIGRLEEFFQDVNTCH  
vsp34 .....ESGNRRKKKNERLQALLGDNEK.....MNLSDVELIP

PI3Kbeta SPLNFCVITSELYVEFKCKYMDSKMKPLWTVNNKVFGEED...SVGVIFKNGDDLRODML  
PI3Kdelta SPLDPSTLLAEVCVEQCTFMDSKMKPLWIMYSNEEAGSGG...SVGIIFKNGDDLRODML  
PI3Kalpha SPLNPAHQGLGNLRLECKRIMSAAKRPWLNLWENPDIMSELLFQNNIIFKNGDDLRODML  
PI3Kgamma VPDYDGLKAGALAECKKVMASKKKPLWLEFKCADPTALSN.ETIGIIFKNGDDLRODML  
PI3KC2alpha LPLKPSLVAKELENIKSCSFFSNNAVPLKVTMVNADPMGEE...INVMFKHGGDDLRODML  
PI3KC2beta LPLSPSLLVKGIIVPRDCSYFNSNAVPLKLSFQNVDPPLGEN...IRVIFKNGDDLRODML  
PI3KC2gamma LPLNPALCIKGIIDHDAICSYFTSNALPLKITFINANPMGKN...ISIIFKAGDDLRODML  
vsp34 LPLEPOVKIRGIIPETATLTKSALMPLAQLFFKTEGGKYP...VIFKHGGDDLRODML

### P-loop

PI3Kbeta TLQMLRLMDLWKEAGLDLRMLPYGCLATGDRSGLEIEVSTSETIADIQLNSSNVAAAAA  
PI3Kdelta TLQMIQLMDVLWKQEGLDLRMTPYGCLPTGDRGLIEVVLRSDTIANIQLNKSNMAATAA  
PI3Kalpha TLQIIRIMENIWQNGQLDLRMLPYGCLSIGDCVGLIEVVRNSHTIMOICKGG.LKGALQ  
PI3Kgamma LQILRLIMESIWETESLDLCLLPYGCIISTGDKIGMIEIVKDATTIAKIQ..QSTVGNITGA  
PI3KC2alpha ALQMIKIMDKIWLKEGLDLRMVIFKCLSTGRDRGMVELVPASDTLRKIQVEYG...VTGS  
PI3KC2beta TLQIRIRMSKIWVOEGLDMRMVIFRCFSTGRGRGMVEMIPNAETLRKIQVEHG...VTGS  
PI3KC2gamma VLQLIQVMNDNIWLOEGLDMQMIIRYRCLSTGKDQGLVQMVDPDAVTLAKIHRHSG...LIGP  
vsp34 ILQIISLMDKLLRKENLDLKLTPYKVLATSTKHGMQFIQSVPAEVLDTGEGS.....

### Hinge loop

PI3Kbeta FNKDALLNWLKEYN.SGDDLDRATEEFTLSCAGYCVASYVLGIGDRHSDNIMVKKTGQLF  
PI3Kdelta FNKDALLNWLKSKN.PGEALDRATEEFTLSCAGYCVATYVVLGIGDRHSDNIMIRESGQLF  
PI3Kalpha FNSHTLHQWLKDKN.KGEIYDAIDLFTSCAGYCVATFVLGIGDRHSDNIMVKKDGGQLF  
PI3Kgamma FKDEVLNHWLKEKSPTEKFFQAAVERFVYSCAGYCVATFVLGIGDRHSDNIMITETGNLF  
PI3KC2alpha FKDKPLAEWLIRKYNPSEEEYKASENFYSCAGCCVATYVVLGICDRHSDNIMLRSGHMF  
PI3KC2beta FKDRPLADWLQKHNPGEDEYEKAVENFIYSCAGCCVATYVVLGICDRHSDNIMLRSGHMF  
PI3KC2gamma LKENTIKKWFQSHHLKADYEKALRNFFYSCAGWCVVTFILGVCDRHSNIMLRSGHMF  
vsp34 .IQNFERKXYAPSENPGFNGISAEVMDTVYKSCAGYCVITYILGVCDRHLNLLLTGKGLF

### Catalytic loop

PI3Kbeta HIDFGHILGNFYSKFGIKRERVVFILTYDFIHVIOQGKTGNTEK..FGRFRQCCEADAYLTI  
PI3Kdelta HIDFGHILGNFKTKFGINRRVVFILTYDFVHVIOQGKTNNSEK..FERFRGYCERAYTI  
PI3Kalpha HIDFGHILDHKKKKFGYKRERVVFVLTQDFLIVISKGAQECTKTREFFERFQEMCVKAYLA  
PI3Kgamma HIDFGHILGNYSKFLGINKERVVFVLTQDFLFLVMGTSKKTSPPH..FQKQFQDICVAYLA  
PI3KC2alpha HIDFGKFLGHAQMFSGIKRDRAPFVLTSDMAYVINGEKP.TIR..FQFVVDLCCQAYNL  
PI3KC2beta HIDFGKFLGHAQMFSGIKRDRAPFVLTSDMAYVINGEKP.SSR..FQFVVDLCCQAYNL  
PI3KC2gamma HIDFGKFLGHAQTFGGIKRDRAPFIFTSEMEYFITEGKKN.PQH..FQFVVDLCCQAYNI  
vsp34 HIDFGYILGRDP....KPLPPPMKLNKEMVEGMSG....TQSEQVQEFKQCYTAFLH

### Activation loop

PI3Kbeta IRRHGNLFTLLFALMLTAGLPELTSVKDTIYQLKDSLALGKSEEEALKQFKQKFDALRES  
PI3Kdelta IRRHGLFLHLFLALMRAAGLPELTSCKDIIYQLKDSLALGKTEEEALKHFRVKFNALRES  
PI3Kalpha IRQHANLFTNLFSMMLGSGMPQLQSFDDIAYIRKTLALDKTEQEALEYFMKQMDAHHGG  
PI3Kgamma IRRHTNLIIILFSMMLMTGMPQLTSKEDIYIYRDALTGVKNEDAKKYFLDQIEVCRDKG  
PI3KC2alpha IRKQTNLFLNLLSLMIPSGLPELTSIQDLKYVRDALQPQTDAEATIFFTRLIESSLG.S  
PI3KC2beta IRKHTHLFLNLLGLMLSCGLPELSDLEDLKYVVDALRPQDTEANATTYFTRLIESSLG.S  
PI3KC2gamma IRKHSQLLNLLLEMLLYAGLPELSGIQDLKYVYNNLRPQDTELEATSHFTKKIKESLE.C  
vsp34 IRRYSNLILN.....

PI3Kbeta WTKVNNWMAH  
PI3Kdelta WTKVNNWLAH  
PI3Kalpha WTKMDWIFH  
PI3Kgamma WTVQFNWFLH  
PI3KC2alpha IATKFNFFIH  
PI3KC2beta VATKLNFFIH  
PI3KC2gamma FPVKLNLLIH  
vsp34 ....

Fig. S1: Sequence alignment of kinase domain of all classes of PI3K showing important regions.

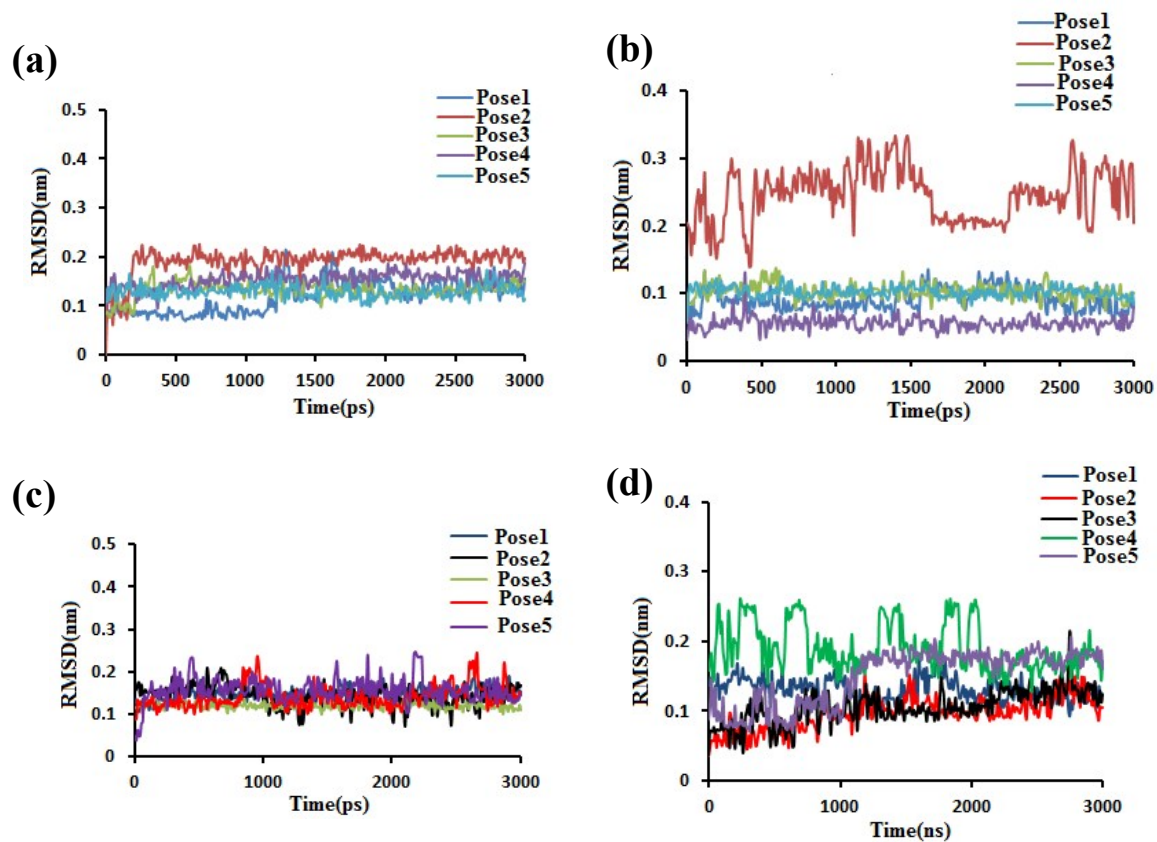

Fig.S2: RMSD profiles of top 5 poses of (a) PI-701 in complex with PI3KC2 $\alpha$  (b) PI-702 in complex with PI3KC2 $\alpha$  (c) PI-701 in complex with PI3KC2 $\gamma$  and (d) PI-702 in complex with PI3KC2 $\gamma$ .

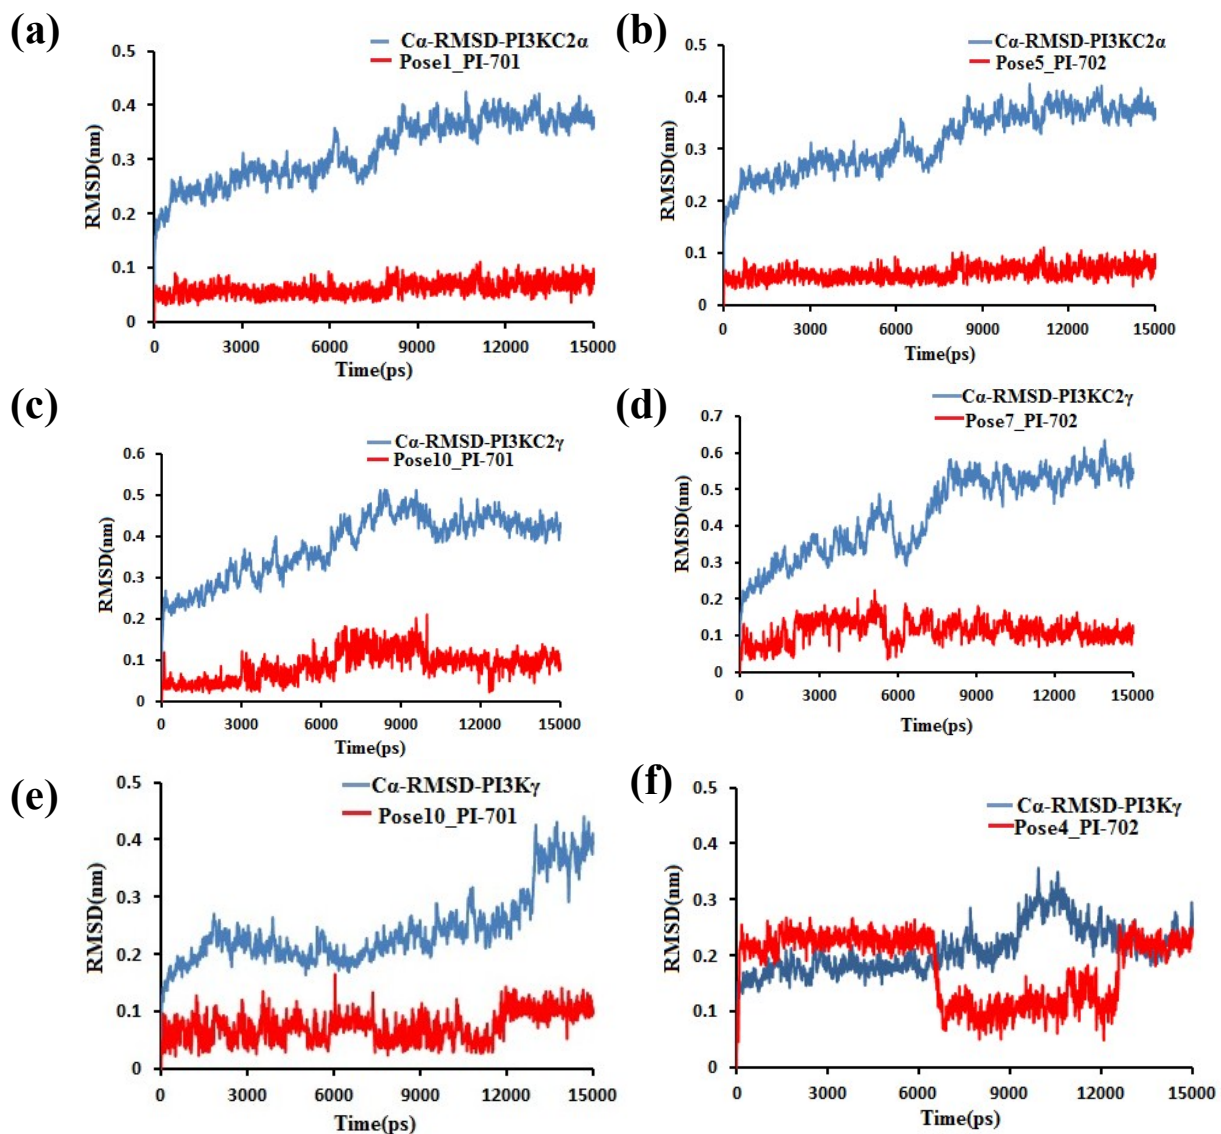

Fig.S3: RMSD of C $\alpha$  and selected pose of (a) PI3KC2 $\alpha$ -PI-701 complex (b) PI3KC2 $\alpha$ -PI-702 complex (c) PI3KC2 $\gamma$ -PI-701 complex (d) PI3KC2 $\gamma$ -PI-702 complex (e) PI3K $\gamma$ -PI-701 complex and (f) PI3K $\gamma$ -PI-702 complex.

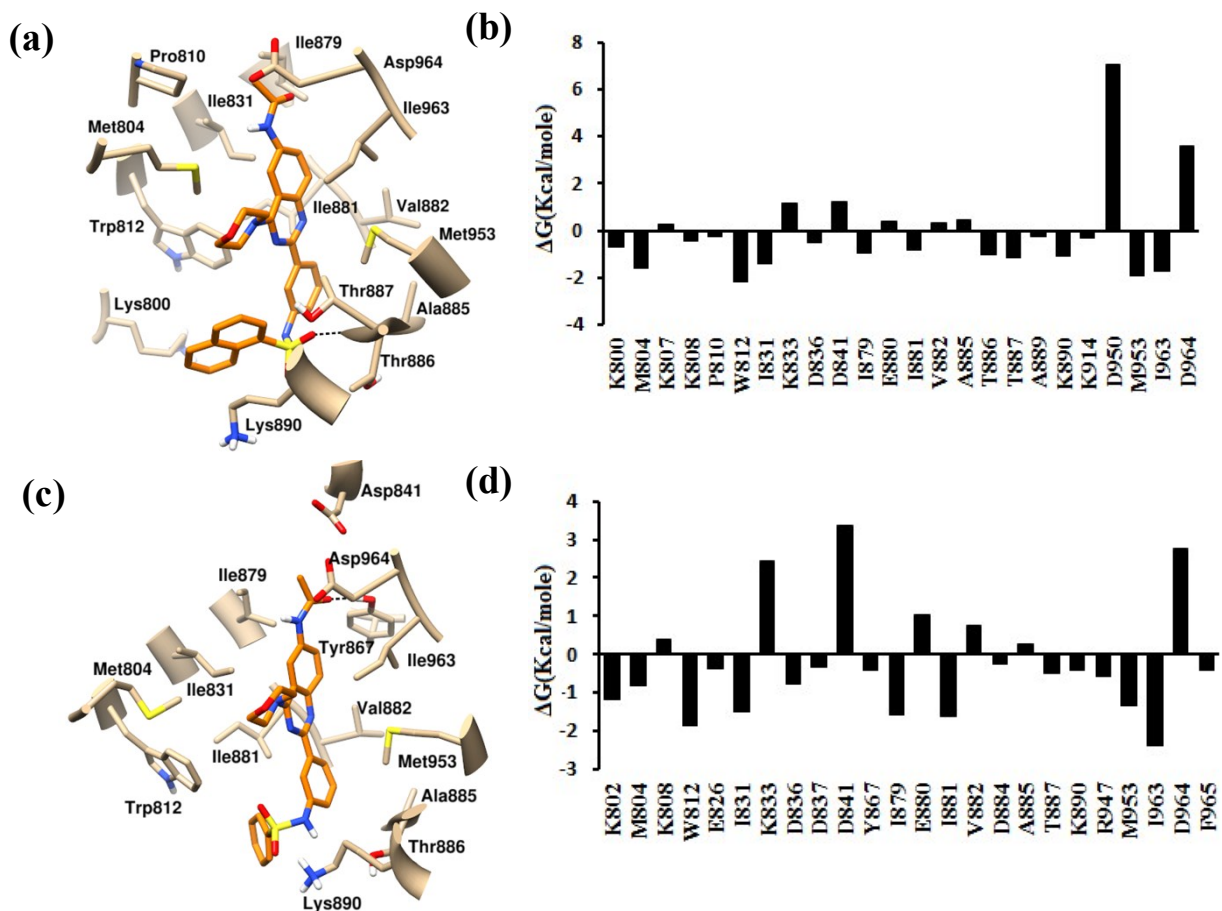

Fig.S4: (a) Binding mode of PI-701 in PI3K $\gamma$  (b) residue wise decomposition of binding free energy of PI3K $\gamma$ -PI-701 complex (c) binding mode of PI-702 in PI3K $\gamma$  and (d) residue wise decomposition of binding free energy of PI3K $\gamma$ -PI-702 complex. In case of PI3K $\gamma$ -PI-702 complex, interaction analysis was carried out on frame obtained at 8.5ns and residue wise free energy decomposition was carried out on frame obtained between 8 and 8.5ns of MD simulation.

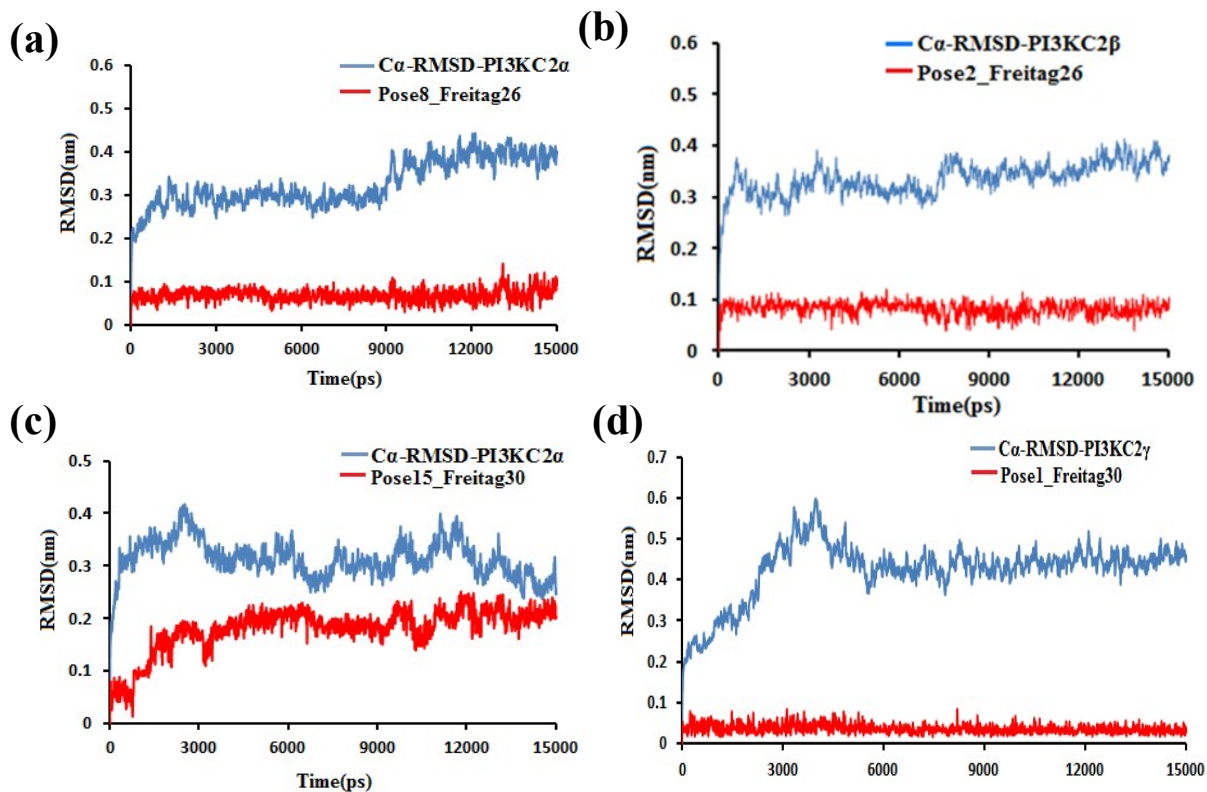

Fig.S5: RMSD of C $\alpha$  and selected pose of (a) PI3KC2 $\alpha$ -Freitag26 complex (b) PI3KC2 $\beta$ -Freitag26 complex (c) PI3KC2 $\alpha$ -Freitag30 complex and (d) PI3KC2 $\gamma$ -Freitag30 complex.

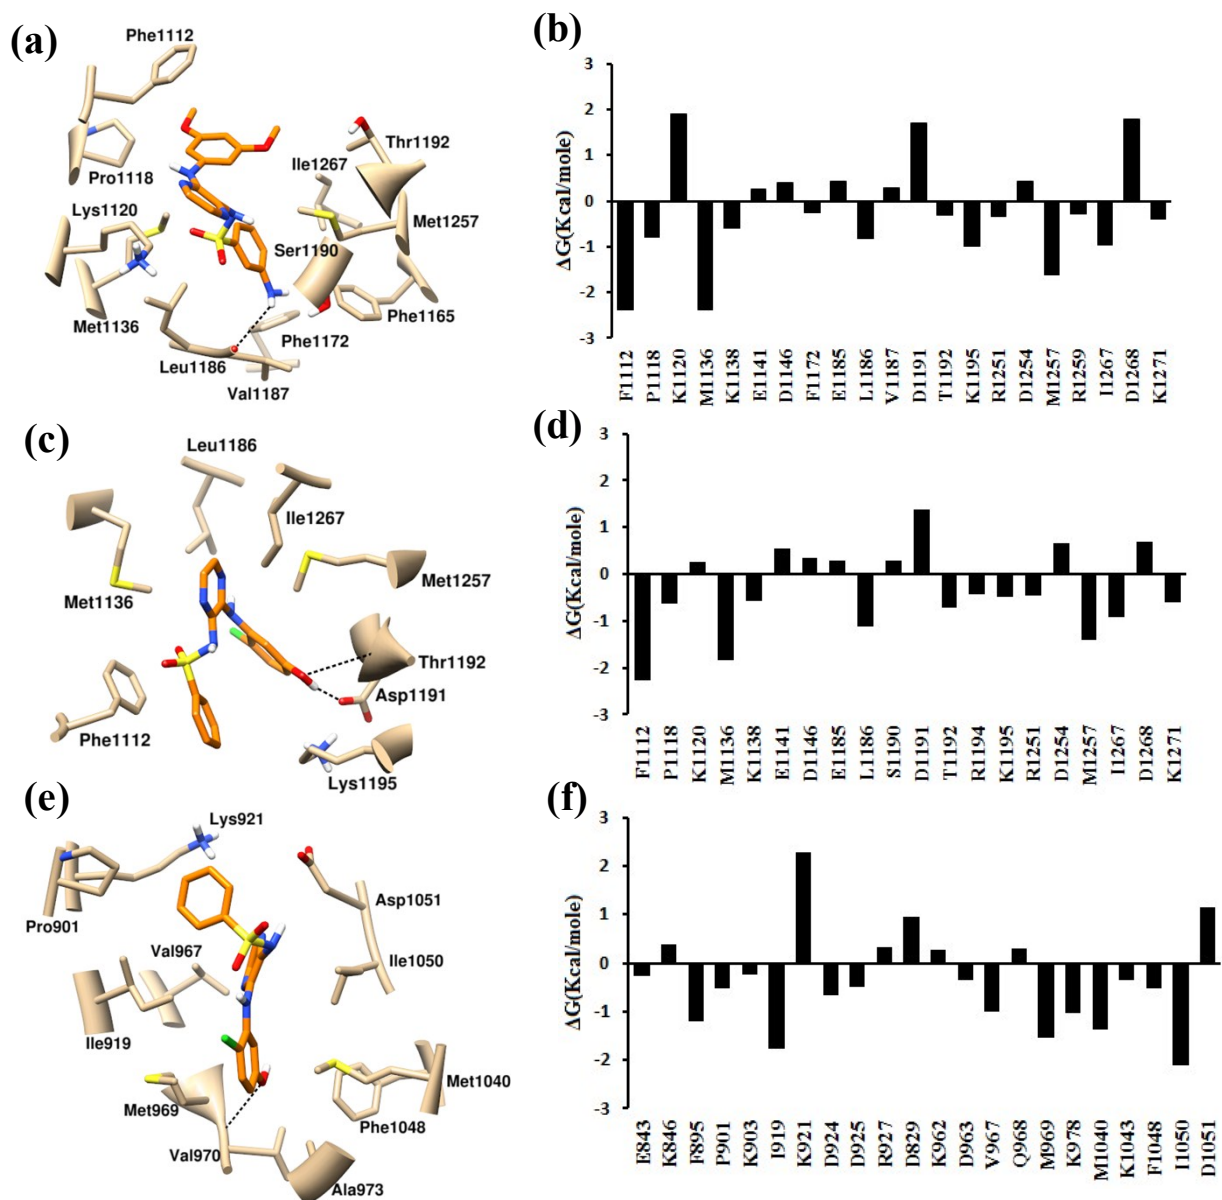

Fig.S6: (a) Binding mode of Freitag26 in PI3KC2α (b) residue wise decomposition of binding free energy of PI3KC2α-Freitag26 complex (c) binding mode of Freitag30 in PI3KC2α and (d) residue wise decomposition of binding free energy of PI3KC2α-Freitag30 complex (e) binding mode of Freitag30 in PI3KC2γ and (f) residue wise free energy decomposition of PI3KC2γ-Freitag30 complex.
